# Supplementary material
Source: Springer Nature journal article supplement (https://www.springermedizin.de/resource/supplementary/12943_2010_724_MOESM7_ESM.pdf/9554662)

A.

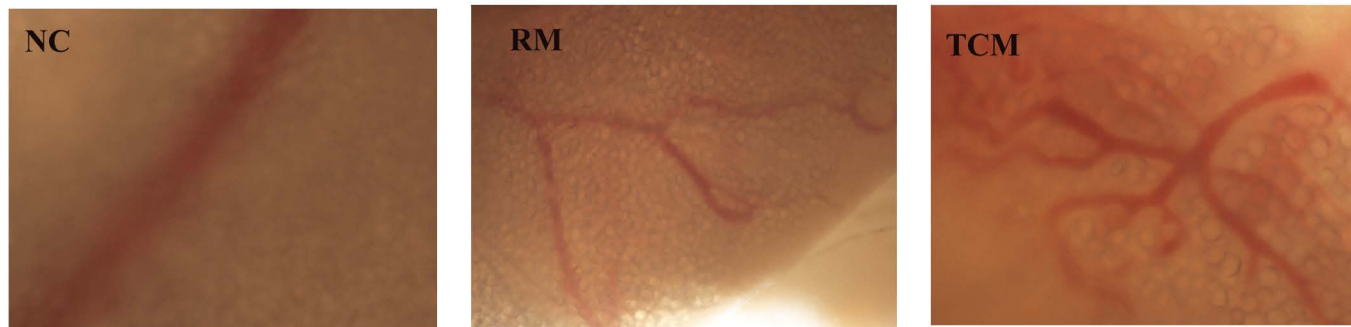

B.

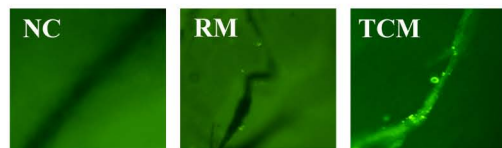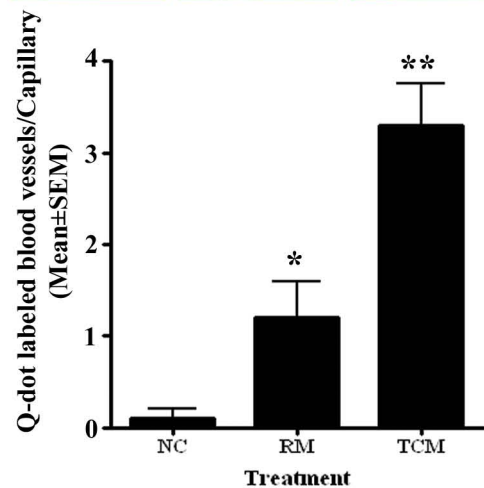

C.

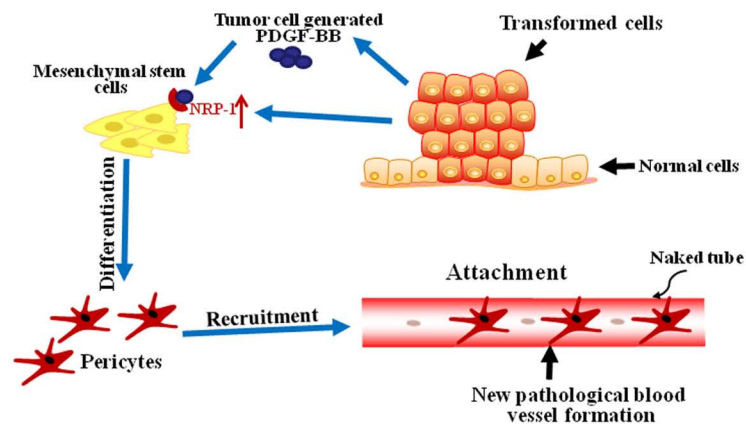

Supplement: MOESM7 [file 9554662]
